# Supplementary material for: Educational videos as a teaching approach to enhance students’ practical skills in preclinical courses
Source: Research Square preprint supplement (doi:10.21203/rs.3.rs-5822344/v1), 2025-03-27
Supplement: Supplementary file 1 [file 36ab17b70473d57a33354eed.docx]

1. The videos contributed to deepening the learning content.

does not apply / applies somewhat / I don´t know / rather applies / applies

2. The videos made it easier to remember the practical process.

does not apply / applies somewhat / I don´t know / rather applies / applies

3. The videos made it possible to increase the precision of the practical exercises

does not apply / applies somewhat / I don´t know / rather applies / applies

4. The practical skills were improved through the videos

does not apply / applies somewhat / I don´t know / rather applies / applies

5. I would have liked to have seen the videos again before the second practical part

does not apply / applies somewhat / I don´t know / rather applies / applies
